# Supplementary material for: Brain endothelial PTPRO drives LPS-induced metabolic reprogramming and neuroinflammation in Sepsis-associated encephalopathy
Source: Research Square preprint supplement (doi:10.21203/rs.3.rs-8847490/v1), 2026-02-23
Supplement: Supplementary file 1 [file 5c215fe11666cf55440e32fd.docx]

Supplementary Table 1

| Antibodies | Source | catalogue numbers | concentrations |
| --- | --- | --- | --- |
| PTPRO/GLEPP1 Monoclonal Antibody | Santa Cruz Biotechnology | Cat#sc-365354  RRID:AB_10841575 | 1:500 |
| HIF-1α (D1S7W) XP® Rabbit mAb | Cell Signaling Technology | Cat#36169, RRID:AB_2799095 | 1:1000 |
| GLUT1 Antibody | Proteintech | Cat#21829-1-AP, RRID:AB_10837075 | 1：4000 |
| GLUT4 Antibody | Proteintech | Cat# 66846-1-Ig, RRID:AB_2882186 | 1:1000 |
| ATP1A1 Antibody | Proteintech | Cat# 14418-1-AP, RRID:AB_2227873 | 1：50000 |
| PHD2 Antibody | Cell Signaling Technology | Cat# 4835, RRID:AB_10561316 | 1:1000 |
| Albumin Antibody | Abcam | Cat#ab131176, RRID:AB_11155750 | 1:4000 |
| Phospho-HER2/ErbB2 (Tyr1221/1222) (6B12) Rabbit Antibody | Cell Signaling Technology | Cat# 2243  RRID:AB_490899 | 1:1000 |
| Phospho-HER2/ErbB2 (Tyr877) Antibody | Cell Signaling Technology | Cat#2241  RRID:AB_2099407 | 1:1000 |
| Phospho-HER2/ErbB2 (Tyr1248) Antibody | Cell Signaling Technology | Cat# 2247  RRID:AB_331725 | 1:1000 |
| Phospho-HER2/ErbB2 (Tyr1196) (D66B7) Rabbit Antibody | Cell Signaling Technology | Cat# 6942  RRID:AB_10860762 | 1:1000 |
| Phospho-HER2/ErbB2 (Thr686) Antibody | Cell Signaling Technology | Cat# 88583, RRID:AB_2800124 | 1:1000 |
| HER2/ErbB2 (29D8) Rabbit mAb | Cell Signaling Technology | Cat# 2165, RRID:AB_10692490 | 1:1000 |
| Phospho-Akt(Ser473) Antibody | Huabio | Cat# ET1607-73, RRID:AB_2940863 | 1:5000 |
| AKT1/2/3 Antibody | Huabio | Cat# ET1609-51, RRID:AB_2940862 | 1:5000 |
| Phospho-mTOR (Ser2481) Antibody | Proteintech | Cat# 28879-1-AP, RRID:AB_3085338 | 1:1000 |
| mTOR antibody | Proteintech | Cat# 28273-1-AP, RRID:AB_2881102 | 1:2000 |
| Pan-Lactyl-lysine Recombinant Rabbit Monoclonal Antibody | Huabio | Cat# HA722037, RRID:AB_3096499 | 1:2000 |
| Anti-L-Lactyl Lysine Rabbit mAb | PTMBIO | Cat# PTM-1401RM, RRID:AB_2942013 | 1:1000 |
| Beta Actin antibody | Proteintech | Cat# 66009-1-Ig, RRID:AB_2687938 | 1:50000 |

Supplementary Table 2

| Applications | Primers | Forward | Reverse |
| --- | --- | --- | --- |
| Realtime-qPCR | PTPRO | GCUCAUACCGAAUGUCAAUTT | AUUGACAUUCGGUAUGAGCTT |
| HIF-1α | CCCAAAGACAATAGCTTCGCA | ACAGTCACCTGGTTGCTGCAA |
| HK2 | TGATCGCCTGCTTATTCACGG | AACCGCCTAGAAATCTCCAGA |
| LDHA | TGTCTCCAGCAAAGACTACTGT | GACTGTACTTGACAATGTTGGGA |
| PFLKL | GGAGGCGAGAACATCAAGCC | CGGCCTTCCCTCGTAGTGA |
| PKM2 | GTGGCTCGGCTGAATTTCTCT | CACCGCAACAGGACGGTAG |
| PDK1 | GGACTTCGGGTCAGTGAATGC | TCCTGAGAAGATTGTCGGGGA |
| TNF-α | CAGGCGGTGCCTATGTCTC | CGATCACCCCGAAGTTCAGTAG |
| IL-1β | GAAATGCCACCTTTTGACAGTG | TGGATGCTCTCATCAGGACAG |
| Actb | TGAGCTGCGTTTTACACCCT | TTTGGGGGATGTTTGCTCCA |
